# Supplementary material for: Associations between commute mode and cardiovascular disease, cancer, and all-cause mortality, and cancer incidence, using linked Census data over 25 years in England and Wales: a cohort study
Source: PubMed Central journal article supplement (PMC7242898; doi:10.1016/s2542-5196(20)30079-6), 2020-05-19
Supplement: mmc1.pdf [file mmc1.pdf]

# THE LANCET

## Planetary Health

### Supplementary appendix

This appendix formed part of the original submission and has been peer reviewed. We post it as supplied by the authors.

Supplement to: Patterson R, Panter J, Vamos EP, Cummins S, Millett C, Laverly AA. Associations between commute mode and cardiovascular disease, cancer, and all-cause mortality, and cancer incidence, using linked Census data over 25 years in England and Wales: a cohort study. *Lancet Planet Health* 2020; **4**: e186–94.

## List of Appendix Tables

|                                                                                                                                                                                                                                           |    |
|-------------------------------------------------------------------------------------------------------------------------------------------------------------------------------------------------------------------------------------------|----|
| Table 1: Commute mode options available in the census forms from 1991 to 2011 .....                                                                                                                                                       | 3  |
| Table 2: International Classification of Diseases and Related Health Problems (ICD) codes used in Revision 9 and Revision 10... 3                                                                                                         | 3  |
| Table 3: Comparison between those eligible for work who were included and excluded from the analyses .....                                                                                                                                | 5  |
| Table 4: Characteristics of participants in 1991 census by commute mode from ONS Longitudinal Study .....                                                                                                                                 | 6  |
| Table 5: Characteristics of participants from 2001 census by commute mode from ONS Longitudinal Study .....                                                                                                                               | 7  |
| Table 6: Characteristics of participants in 2011 census by commute mode from ONS Longitudinal Study .....                                                                                                                                 | 8  |
| Table 7: Baseline characteristics of individuals and commute mode with disaggregated public transport modes from ONS Longitudinal Study 1991-2016 .....                                                                                   | 9  |
| Table 8: Cox regression analyses of commute mode and mortality and cancer outcomes using the ONS Longitudinal Study 1991-2016 .....                                                                                                       | 10 |
| Table 9: P-values for tests for interaction for each exposure and outcome combination .....                                                                                                                                               | 11 |
| Table 10: NSSEC stratified Cox regression analyses of commute mode and mortality and cancer outcomes from the ONS Longitudinal Study 1991-2015/16 .....                                                                                   | 12 |
| Table 11: Sex stratified Cox regression analyses of commute mode and mortality and cancer outcomes from the ONS Longitudinal Study 1991-2015/16 .....                                                                                     | 13 |
| Table 12: straight line distance to work (km) among sample for 2001 and 2011 .....                                                                                                                                                        | 14 |
| Table 13: Cox regression analyses of commute mode and mortality and cancer outcomes using the ONS Longitudinal Study 1991-2016 disaggregating long and short distance commuters.....                                                      | 15 |
| Table 14: Baseline characteristics of sample and deaths 2001-2016 for participants in analyses of changes in mode between 1991 and 2001 – switching between private motorised vehicle and active or public transport and vice versa ..... | 16 |
| Table 15: Cox regression analyses of change in commute mode between 1991 and 2001 (active and public versus private motorised vehicle) and mortality and cancer outcomes from the ONS Longitudinal Study 2001-2015/16.....                | 18 |
| Table 16: Cox regression analyses of commute mode and mortality using the ONS Longitudinal Study 2001-2011 with and without adjustment for self-reported health .....                                                                     | 19 |
| Table 17: Cox regression analyses of commute mode and mortality outcomes using the ONS Longitudinal Study 1991-2016, excluded the first 2 years of follow-up in each 10 year period .....                                                 | 20 |
| Table 18: Cross tabulation of commute modes for this present in consecutive censuses .....                                                                                                                                                | 21 |

## **Acknowledgement**

This work contains statistical data from the Office for National Statistics (ONS) which is Crown Copyright. The use of the ONS statistical data in this work does not imply the endorsement of the ONS in relation to the interpretation or analysis of the statistical data. This work uses research datasets which may not exactly reproduce National Statistics aggregates.

The permission of the Office for National Statistics to use the Longitudinal Study is gratefully acknowledged, as is the help provided by staff of the Centre for Longitudinal Study Information & User Support (CeLSIUS). CeLSIUS is supported by the ESRC Census of Population Programme under project ES/R00823X/1. The authors alone are responsible for the interpretation of the data.

**Table 1: Commute mode options available in the census forms from 1991 to 2011**

|                           | 1991                                                                                        | 2001                                                                                       | 2011                                                                                      |
|---------------------------|---------------------------------------------------------------------------------------------|--------------------------------------------------------------------------------------------|-------------------------------------------------------------------------------------------|
| Private motorised vehicle | Motor cycle, scooter, moped<br>Driving a car or van<br>Passenger in a car or van            | Motor cycle, scooter or moped<br>Driving a car or van<br>Passenger in a car or van<br>Taxi | Motorcycle, scooter or moped<br>Driving a car or van<br>Passenger in a car or van<br>Taxi |
| Public Transport          | Bus, minibus or coach (public or private)<br>Underground, tube, metro<br>British Rail train | Bus, minibus or coach<br>Underground, metro, light-rail, tram<br>Train                     | Bus, minibus or coach<br>Underground, metro, light rail, tram<br>Train                    |
| Cycle                     | Pedal cycle                                                                                 | Bicycle                                                                                    | Bicycle                                                                                   |
| Walk                      | On foot                                                                                     | On foot                                                                                    | On foot                                                                                   |
| Excluded                  |                                                                                             | Work mainly at or from home                                                                | Work mainly at or from home                                                               |
|                           | Other please specify                                                                        | Other                                                                                      | Other                                                                                     |

**Table 2: International Classification of Diseases and Related Health Problems (ICD) codes used in Revision 9 and Revision 10**

|                                      | ICD-10           | ICD-9             |
|--------------------------------------|------------------|-------------------|
| CVD (diseases of circulatory system) | I20-25 + I60-69  | 410-414 + 430-438 |
| Neoplasms                            | C00-C97 + D37-84 | 140-209 +235-239  |

**Figure 1: Flow diagram showing sample exclusions**

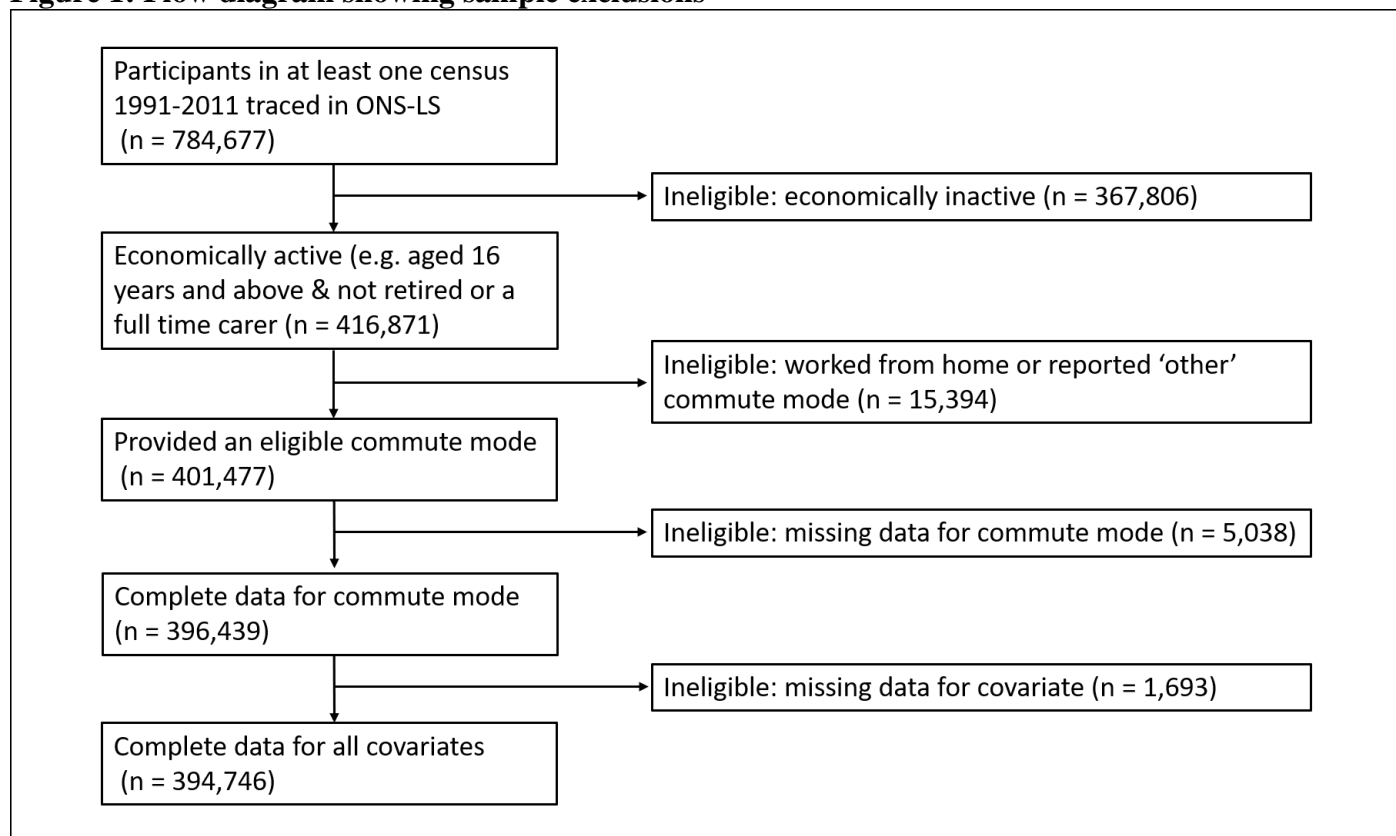

**Table 3: Comparison between those eligible for work who were included and excluded from the analyses**

|                             | Sample  |       | Excluded |       |
|-----------------------------|---------|-------|----------|-------|
|                             | N       | %     | N        | %     |
| All individuals             | 394746  |       | 6,731    |       |
| <b>Commute mode</b>         |         |       |          |       |
| Private motorised           | 258,665 | 65.5% | 896      | 53.1% |
| Public Transport            | 74,377  | 18.8% | 333      | 19.7% |
| Walk                        | 49,024  | 12.4% | 415      | 24.6% |
| Cycle                       | 12,680  | 3.2%  | 44       | 2.6%  |
| Total                       | 394,746 |       | 1,688    |       |
| <b>Age</b>                  |         |       |          |       |
| 16-29                       | 149,585 | 37.9% | 883      | 26.7% |
| 30-44                       | 142,962 | 36.2% | 705      | 21.3% |
| 45-59                       | 85,677  | 21.7% | 1,212    | 36.6% |
| 60+                         | 16,522  | 4.2%  | 509      | 15.4% |
| Total                       | 394,746 |       | 3,309    |       |
| <b>Sex</b>                  |         |       |          |       |
| Male                        | 209,510 | 53.1% | 3,678    | 54.6% |
| Female                      | 185,236 | 46.9% | 3,053    | 45.4% |
| Total                       | 394,746 |       | 6,731    |       |
| <b>Housing tenure</b>       |         |       |          |       |
| Homeowner                   | 288,585 | 73.1% | 1,708    | 67.3% |
| Non-homeowner               | 106,161 | 26.9% | 831      | 32.7% |
| Total                       | 394,746 |       | 2,539    |       |
| <b>Marital status</b>       |         |       |          |       |
| Unmarried                   | 190,560 | 48.3% | 1,495    | 45.3% |
| Married                     | 204,186 | 51.7% | 1,806    | 54.7% |
| Total                       | 394,746 |       | 3,301    |       |
| <b>Ethnicity</b>            |         |       |          |       |
| White                       | 353,842 | 89.6% | 2,865    | 88.5% |
| Minority ethnicity          | 40,904  | 10.4% | 374      | 11.5% |
| Total                       | 394,746 |       | 3,239    |       |
| <b>University education</b> |         |       |          |       |
| No degree                   | 313,291 | 79.4% | 3,007    | 92.5% |
| Has a degree                | 81,455  | 20.6% | 243      | 7.5%  |
| Total                       | 394,746 |       | 3,250    |       |
| <b>Car access</b>           |         |       |          |       |
| No car access               | 53,953  | 13.7% | 602      | 23.0% |
| Has access to a car         | 340,793 | 86.3% | 2,010    | 77.0% |
| Total                       | 394,746 |       | 2,612    |       |
| <b>Population density</b>   |         |       |          |       |
| 0-2,000 persons/km2         | 172,332 | 43.7% | 1,427    | 44.5% |
| 2,000+ persons/km2          | 222,414 | 56.3% | 1,777    | 55.5% |
| Total                       | 394,746 |       | 3,204    |       |
| <b>NSSEC – social class</b> |         |       |          |       |
| Higher                      | 130,262 | 33.0% | 871      | 32.3% |
| Intermediate                | 98,302  | 24.9% | 786      | 29.1% |
| Routine/Manual              | 166,182 | 42.1% | 1,043    | 38.6% |
| Total                       | 394,746 |       | 2,700    |       |
| <b>Carstairs quintile</b>   |         |       |          |       |
| Least deprived              | 76,945  | 19.5% | 425      | 18.6% |
| 2                           | 79,575  | 20.2% | 372      | 16.2% |
| 3                           | 80,434  | 20.4% | 406      | 17.7% |
| 4                           | 81,108  | 20.5% | 487      | 21.3% |
| Most deprived               | 76,684  | 19.4% | 601      | 26.2% |
| Total                       | 394,746 |       | 2,291    |       |
| <b>Long term illness</b>    |         |       |          |       |
| No illness                  | 376,939 | 95.5% | 3,037    | 92.1% |
| Has an illness              | 17,807  | 4.5%  | 260      | 7.9%  |
| Total                       | 394,746 |       | 3,297    |       |

NSSEC – National Statistics socio-economic classification

Source: Office for National Statistics (ONS) Longitudinal Study of England and Wales

**Table 4: Characteristics of participants in 1991 census by commute mode from ONS Longitudinal Study**

|                                 | Private motorised (%) | Public Transport (%) | Walk (%) | Cycle (%) | Total   |
|---------------------------------|-----------------------|----------------------|----------|-----------|---------|
| <b>All</b>                      | 68.4%                 | 16.3%                | 12.0%    | 3.3%      | 209,209 |
| <b>Age</b>                      |                       |                      |          |           |         |
| 16-29                           | 64.2%                 | 21.0%                | 11.5%    | 3.3%      | 61,480  |
| 30-44                           | 72.0%                 | 13.6%                | 11.2%    | 3.2%      | 79,233  |
| 45-59                           | 68.8%                 | 14.9%                | 13.0%    | 3.3%      | 57,506  |
| 60+                             | 63.7%                 | 16.8%                | 15.8%    | 3.8%      | 10,990  |
| <b>Sex</b>                      |                       |                      |          |           |         |
| Male                            | 76.0%                 | 12.5%                | 7.7%     | 3.8%      | 117,789 |
| Female                          | 58.6%                 | 21.1%                | 17.6%    | 2.7%      | 91,420  |
| <b>Housing tenure</b>           |                       |                      |          |           |         |
| Homeowner                       | 72.6%                 | 14.4%                | 10.0%    | 3.0%      | 169,125 |
| Non-homeowner                   | 50.7%                 | 24.1%                | 20.7%    | 4.5%      | 40,084  |
| <b>Marital status</b>           |                       |                      |          |           |         |
| Unmarried                       | 61.4%                 | 22.6%                | 12.6%    | 3.4%      | 74,156  |
| Married                         | 72.2%                 | 12.8%                | 11.7%    | 3.2%      | 135,053 |
| <b>Ethnicity</b>                |                       |                      |          |           |         |
| White                           | 69.2%                 | 15.3%                | 12.0%    | 3.4%      | 197,922 |
| Minority ethnicity              | 53.8%                 | 33.4%                | 11.8%    | 0.9%      | 11,287  |
| <b>University education</b>     |                       |                      |          |           |         |
| No degree                       | 67.9%                 | 16.0%                | 12.7%    | 3.3%      | 188,526 |
| Has a degree                    | 72.7%                 | 18.5%                | 5.8%     | 3.1%      | 20,683  |
| <b>Car access</b>               |                       |                      |          |           |         |
| No car access                   | 18.3%                 | 44.7%                | 29.9%    | 7.1%      | 25,315  |
| Has access to a car             | 75.3%                 | 12.4%                | 9.6%     | 2.8%      | 183,894 |
| <b>Population density</b>       |                       |                      |          |           |         |
| 0-2,000 persons/km <sup>2</sup> | 75.8%                 | 10.1%                | 10.9%    | 3.2%      | 100,130 |
| 2,000+ persons/km <sup>2</sup>  | 61.5%                 | 21.9%                | 13.1%    | 3.5%      | 109,079 |
| <b>NSSEC – social class</b>     |                       |                      |          |           |         |
| Higher                          | 78.3%                 | 14.0%                | 5.6%     | 2.0%      | 62,588  |
| Intermediate                    | 71.6%                 | 17.7%                | 8.7%     | 2.0%      | 55,611  |
| Routine/Manual                  | 59.6%                 | 17.0%                | 18.4%    | 5.0%      | 91,010  |
| <b>Carstairs quintile</b>       |                       |                      |          |           |         |
| Least deprived                  | 79.4%                 | 10.2%                | 7.3%     | 3.1%      | 45,127  |
| 2                               | 74.3%                 | 12.3%                | 10.2%    | 3.2%      | 44,602  |
| 3                               | 69.0%                 | 14.7%                | 12.7%    | 3.7%      | 43,240  |
| 4                               | 62.8%                 | 18.9%                | 14.7%    | 3.6%      | 41,601  |
| Most deprived                   | 52.3%                 | 28.2%                | 16.5%    | 3.0%      | 34,639  |
| <b>Long term illness</b>        |                       |                      |          |           |         |
| No illness                      | 68.5%                 | 16.2%                | 12.0%    | 3.3%      | 202,200 |
| Has an illness                  | 65.3%                 | 18.6%                | 13.1%    | 2.9%      | 7,009   |
| <b>Events (1991-2001)</b>       |                       |                      |          |           |         |
| All-cause mortality             | 66.1%                 | 17.1%                | 13.7%    | 3.1%      | 6,169   |
| CVD mortality                   | 68.8%                 | 15.5%                | 12.5%    | 3.2%      | 1,707   |
| Cancer incidence                | 68.5%                 | 14.7%                | 13.8%    | 3.0%      | 7,083   |
| Cancer mortality                | 61.9%                 | 20.0%                | 14.8%    | 3.3%      | 2,733   |

NSSEC – National Statistics socio-economic classification

Source: Office for National Statistics (ONS) Longitudinal Study of England and Wales

**Table 5: Characteristics of participants from 2001 census by commute mode from ONS Longitudinal Study**

|                                 | <b>Private motorised (%)</b> | <b>Public Transport (%)</b> | <b>Walk (%)</b> | <b>Cycle (%)</b> | <b>Total</b> |
|---------------------------------|------------------------------|-----------------------------|-----------------|------------------|--------------|
| <b>All</b>                      | 72.1%                        | 14.7%                       | 10.2%           | 3.0%             | 209,371      |
| <b>Age</b>                      |                              |                             |                 |                  |              |
| 16-29                           | 63.9%                        | 21.7%                       | 11.2%           | 3.2%             | 47,295       |
| 30-44                           | 74.3%                        | 13.4%                       | 9.1%            | 3.2%             | 84,651       |
| 45-59                           | 75.0%                        | 11.7%                       | 10.6%           | 2.6%             | 66,528       |
| 60+                             | 72.4%                        | 12.4%                       | 12.4%           | 2.8%             | 10,897       |
| <b>Sex</b>                      |                              |                             |                 |                  |              |
| Male                            | 76.9%                        | 12.3%                       | 6.8%            | 4.0%             | 111,755      |
| Female                          | 66.6%                        | 17.4%                       | 14.2%           | 1.8%             | 97,616       |
| <b>Housing tenure</b>           |                              |                             |                 |                  |              |
| Homeowner                       | 76.0%                        | 12.8%                       | 8.5%            | 2.7%             | 170,369      |
| Non-homeowner                   | 55.1%                        | 23.0%                       | 17.7%           | 4.2%             | 39,002       |
| <b>Marital status</b>           |                              |                             |                 |                  |              |
| Unmarried                       | 65.8%                        | 19.7%                       | 11.2%           | 3.3%             | 90,958       |
| Married                         | 76.9%                        | 10.9%                       | 9.4%            | 2.8%             | 118,413      |
| <b>Ethnicity</b>                |                              |                             |                 |                  |              |
| White                           | 73.1%                        | 13.6%                       | 10.2%           | 3.1%             | 194,860      |
| Minority ethnicity              | 58.5%                        | 29.9%                       | 10.4%           | 1.2%             | 14,511       |
| <b>University education</b>     |                              |                             |                 |                  |              |
| No degree                       | 72.1%                        | 13.5%                       | 11.3%           | 3.0%             | 159,300      |
| Has a degree                    | 72.0%                        | 18.6%                       | 6.6%            | 2.8%             | 50,071       |
| <b>Car access</b>               |                              |                             |                 |                  |              |
| No car access                   | 19.9%                        | 44.6%                       | 28.1%           | 7.4%             | 19,458       |
| Has access to a car             | 77.4%                        | 11.6%                       | 8.4%            | 2.5%             | 189,913      |
| <b>Population density</b>       |                              |                             |                 |                  |              |
| 0-2,000 persons/km <sup>2</sup> | 79.8%                        | 8.5%                        | 9.1%            | 2.6%             | 100,134      |
| 2,000+ persons/km <sup>2</sup>  | 65.0%                        | 20.4%                       | 11.2%           | 3.3%             | 109,237      |
| <b>NSSEC – social class</b>     |                              |                             |                 |                  |              |
| Higher                          | 76.0%                        | 16.0%                       | 5.8%            | 2.2%             | 82,367       |
| Intermediate                    | 74.9%                        | 15.3%                       | 8.2%            | 1.6%             | 44,524       |
| Routine/Manual                  | 66.7%                        | 13.1%                       | 15.7%           | 4.5%             | 82,480       |
| <b>Carstairs quintile</b>       |                              |                             |                 |                  |              |
| Least deprived                  | 82.7%                        | 8.9%                        | 6.1%            | 2.3%             | 45,498       |
| 2                               | 77.3%                        | 11.1%                       | 8.6%            | 3.0%             | 45,447       |
| 3                               | 72.2%                        | 13.2%                       | 11.3%           | 3.3%             | 43,900       |
| 4                               | 68.1%                        | 16.1%                       | 12.5%           | 3.3%             | 40,702       |
| Most deprived                   | 55.5%                        | 27.7%                       | 13.8%           | 3.1%             | 33,824       |
| <b>Long term illness</b>        |                              |                             |                 |                  |              |
| No illness                      | 72.2%                        | 14.7%                       | 10.1%           | 3.0%             | 195,225      |
| Has an illness                  | 71.1%                        | 14.5%                       | 11.7%           | 2.7%             | 14,146       |
| <b>Events (2001-2011)</b>       |                              |                             |                 |                  |              |
| All-cause mortality             | 71.5%                        | 13.3%                       | 12.4%           | 2.8%             | 4,963        |
| CVD mortality                   | 74.5%                        | 12.0%                       | 11.0%           | 2.5%             | 1,000        |
| Cancer incidence                | 75.2%                        | 11.6%                       | 10.4%           | 2.7%             | 8,806        |
| Cancer mortality                | 68.1%                        | 15.7%                       | 13.4%           | 2.9%             | 2,381        |

NSSEC – National Statistics socio-economic classification

Source: Office for National Statistics (ONS) Longitudinal Study of England and Wales



**Table 6: Characteristics of participants in 2011 census by commute mode from ONS Longitudinal Study**

|                                 | Private motorised (%) | Public Transport (%) | Walk (%) | Cycle (%) | Total   |
|---------------------------------|-----------------------|----------------------|----------|-----------|---------|
| <b>All</b>                      | 69.9%                 | 16.6%                | 10.6%    | 2.9%      | 247,074 |
| <b>Age</b>                      |                       |                      |          |           |         |
| 16-29                           | 60.4%                 | 23.0%                | 13.6%    | 3.0%      | 51,542  |
| 30-44                           | 69.8%                 | 17.6%                | 9.4%     | 3.3%      | 88,770  |
| 45-59                           | 74.7%                 | 12.7%                | 10.0%    | 2.6%      | 83,873  |
| 60+                             | 74.6%                 | 12.5%                | 11.0%    | 2.0%      | 22,889  |
| <b>Sex</b>                      |                       |                      |          |           |         |
| Male                            | 73.6%                 | 14.8%                | 7.7%     | 3.9%      | 129,675 |
| Female                          | 65.9%                 | 18.6%                | 13.8%    | 1.7%      | 117,399 |
| <b>Housing tenure</b>           |                       |                      |          |           |         |
| Homeowner                       | 75.6%                 | 13.5%                | 8.4%     | 2.6%      | 181,000 |
| Non-homeowner                   | 54.4%                 | 25.1%                | 16.8%    | 3.7%      | 66,074  |
| <b>Marital status</b>           |                       |                      |          |           |         |
| Unmarried                       | 64.3%                 | 20.3%                | 12.2%    | 3.1%      | 118,312 |
| Married                         | 75.1%                 | 13.2%                | 9.1%     | 2.6%      | 128,762 |
| <b>Ethnicity</b>                |                       |                      |          |           |         |
| White                           | 72.2%                 | 14.2%                | 10.5%    | 3.1%      | 215,897 |
| Minority ethnicity              | 54.1%                 | 33.1%                | 11.3%    | 1.5%      | 31,177  |
| <b>University education</b>     |                       |                      |          |           |         |
| No degree                       | 71.2%                 | 14.1%                | 12.1%    | 2.6%      | 161,350 |
| Has a degree                    | 67.5%                 | 21.3%                | 7.9%     | 3.3%      | 85,724  |
| <b>Car access</b>               |                       |                      |          |           |         |
| No car access                   | 17.2%                 | 49.5%                | 26.6%    | 6.7%      | 26,693  |
| Has access to a car             | 76.3%                 | 12.6%                | 8.7%     | 2.4%      | 220,381 |
| <b>Population density</b>       |                       |                      |          |           |         |
| 0-2,000 persons/km <sup>2</sup> | 80.3%                 | 8.6%                 | 9.0%     | 2.1%      | 106,563 |
| 2,000+ persons/km <sup>2</sup>  | 62.1%                 | 22.6%                | 11.9%    | 3.4%      | 140,511 |
| <b>NSSEC – social class</b>     |                       |                      |          |           |         |
| Higher                          | 70.6%                 | 19.2%                | 7.2%     | 2.9%      | 97,389  |
| Intermediate                    | 73.7%                 | 14.8%                | 9.7%     | 1.8%      | 63,203  |
| Routine/Manual                  | 66.4%                 | 14.9%                | 15.1%    | 3.6%      | 86,482  |
| <b>Carstairs quintile</b>       |                       |                      |          |           |         |
| Least deprived                  | 80.2%                 | 10.4%                | 7.1%     | 2.3%      | 50,606  |
| 2                               | 75.6%                 | 12.8%                | 8.9%     | 2.8%      | 52,309  |
| 3                               | 71.5%                 | 14.1%                | 11.4%    | 3.0%      | 51,105  |
| 4                               | 66.3%                 | 18.1%                | 12.5%    | 3.1%      | 49,038  |
| Most deprived                   | 53.5%                 | 29.5%                | 13.7%    | 3.2%      | 44,016  |
| <b>Long term illness</b>        |                       |                      |          |           |         |
| No illness                      | 69.9%                 | 16.7%                | 10.5%    | 2.9%      | 229,114 |
| Has an illness                  | 70.8%                 | 15.8%                | 11.4%    | 2.0%      | 17,960  |
| <b>Events (2011-2015/16)</b>    |                       |                      |          |           |         |
| All-cause mortality             | 71.5%                 | 14.8%                | 11.1%    | 2.6%      | 2,851   |
| CVD mortality                   | 70.9%                 | 16.5%                | 9.4%     | 3.2%      | 467     |
| Cancer incidence                | 75.4%                 | 12.7%                | 9.7%     | 2.2%      | 5,094   |
| Cancer mortality                | 70.3%                 | 16.3%                | 10.9%    | 2.5%      | 1,399   |

NSSEC – National Statistics socio-economic classification

Source: Office for National Statistics (ONS) Longitudinal Study of England and Wales

**Table 7: Baseline characteristics of individuals and commute mode with disaggregated public transport modes from ONS Longitudinal Study 1991-2016**

|                                 | <b>Private motorised vehicle (%)</b> | <b>Bus (%)</b> | <b>Rail (%)</b> | <b>Walk (%)</b> | <b>Cycle (%)</b> | <b>Total</b> |
|---------------------------------|--------------------------------------|----------------|-----------------|-----------------|------------------|--------------|
| <b>All</b>                      | 65.5%                                | 10.3%          | 8.5%            | 12.4%           | 3.2%             | 394,746      |
| <b>Age</b>                      |                                      |                |                 |                 |                  |              |
| 16-29                           | 61.9%                                | 12.2%          | 10.4%           | 12.3%           | 3.2%             | 149,593      |
| 30-44                           | 68.0%                                | 8.3%           | 8.8%            | 11.6%           | 3.3%             | 142,958      |
| 45-59                           | 67.8%                                | 10.2%          | 5.4%            | 13.4%           | 3.0%             | 85,674       |
| 60+                             | 64.3%                                | 11.3%          | 5.5%            | 15.7%           | 3.2%             | 16,521       |
| <b>Sex</b>                      |                                      |                |                 |                 |                  |              |
| Men                             | 71.6%                                | 6.9%           | 8.7%            | 8.7%            | 4.0%             | 209,510      |
| Women                           | 58.7%                                | 14.1%          | 8.3%            | 16.6%           | 2.3%             | 185,236      |
| <b>Housing tenure</b>           |                                      |                |                 |                 |                  |              |
| Homeowner                       | 71.3%                                | 8.2%           | 7.6%            | 10.0%           | 2.9%             | 288,584      |
| Non-homeowner                   | 49.8%                                | 16.0%          | 11.1%           | 18.9%           | 4.2%             | 106,162      |
| <b>Marital status</b>           |                                      |                |                 |                 |                  |              |
| Unmarried                       | 60.0%                                | 12.8%          | 10.8%           | 13.0%           | 3.4%             | 190,566      |
| Married                         | 70.7%                                | 8.0%           | 6.4%            | 11.9%           | 3.0%             | 204,180      |
| <b>Ethnicity</b>                |                                      |                |                 |                 |                  |              |
| White                           | 67.2%                                | 9.4%           | 7.5%            | 12.4%           | 3.4%             | 353,842      |
| Minority ethnicity              | 50.9%                                | 17.7%          | 17.5%           | 12.5%           | 1.4%             | 40,904       |
| <b>University education</b>     |                                      |                |                 |                 |                  |              |
| No degree                       | 66.3%                                | 11.2%          | 6.0%            | 13.4%           | 3.2%             | 313,292      |
| Has a degree                    | 62.5%                                | 6.9%           | 18.5%           | 8.7%            | 3.4%             | 81,454       |
| <b>Car access</b>               |                                      |                |                 |                 |                  |              |
| No car access                   | 17.9%                                | 29.9%          | 17.6%           | 27.9%           | 6.7%             | 53,952       |
| Has access to a car             | 73.1%                                | 7.2%           | 7.1%            | 10.0%           | 2.7%             | 340,794      |
| <b>Population density</b>       |                                      |                |                 |                 |                  |              |
| 0-2,000 persons/km <sup>2</sup> | 75.3%                                | 6.5%           | 4.1%            | 11.2%           | 2.9%             | 172,330      |
| 2,000+ persons/km <sup>2</sup>  | 57.9%                                | 13.2%          | 12.0%           | 13.4%           | 3.5%             | 222,416      |
| <b>NSSEC – social class</b>     |                                      |                |                 |                 |                  |              |
| Higher                          | 70.4%                                | 5.9%           | 13.8%           | 7.3%            | 2.6%             | 130,264      |
| Intermediate                    | 69.4%                                | 10.0%          | 9.1%            | 9.6%            | 1.9%             | 98,298       |
| Routine/Manual                  | 59.4%                                | 13.9%          | 4.1%            | 18.1%           | 4.5%             | 166,184      |
| <b>Carstairs quintile</b>       |                                      |                |                 |                 |                  |              |
| Least deprived                  | 78.1%                                | 4.3%           | 6.7%            | 8.0%            | 2.8%             | 76,946       |
| 2                               | 72.4%                                | 6.6%           | 7.3%            | 10.6%           | 3.1%             | 79,574       |
| 3                               | 66.7%                                | 9.0%           | 7.6%            | 13.2%           | 3.5%             | 80,434       |
| 4                               | 61.0%                                | 12.7%          | 8.2%            | 14.6%           | 3.4%             | 81,109       |
| Most deprived                   | 49.3%                                | 19.0%          | 13.0%           | 15.6%           | 3.2%             | 76,683       |
| <b>Long term illness</b>        |                                      |                |                 |                 |                  |              |
| No illness                      | 65.6%                                | 10.1%          | 8.6%            | 12.3%           | 3.2%             | 376,939      |
| Has an illness                  | 63.1%                                | 13.6%          | 6.4%            | 14.3%           | 2.7%             | 17,807       |
| <b>Entered study</b>            |                                      |                |                 |                 |                  |              |
| 1991                            | 68.4%                                | 9.9%           | 6.4%            | 12.0%           | 3.3%             | 209,217      |
| 2001                            | 65.2%                                | 10.3%          | 9.0%            | 12.4%           | 3.1%             | 88,633       |
| 2011                            | 59.6%                                | 11.2%          | 12.8%           | 13.3%           | 3.1%             | 96,896       |
| <b>Events</b>                   |                                      |                |                 |                 |                  |              |
| All-cause mortality             | 67.8%                                | 10.5%          | 5.4%            | 13.1%           | 3.1%             | 13,983       |
| CVD mortality                   | 69.9%                                | 9.8%           | 5.2%            | 12.1%           | 2.9%             | 3,172        |
| Cancer incidence                | 73.0%                                | 8.0%           | 4.9%            | 11.4%           | 2.7%             | 20,980       |
| Cancer mortality                | 64.4%                                | 12.0%          | 6.2%            | 14.0%           | 3.5%             | 6,509        |

NSSEC – National Statistics socio-economic classification

Source: Office for National Statistics (ONS) Longitudinal Study of England and Wales

**Table 8: Cox regression analyses of commute mode and mortality and cancer outcomes using the ONS Longitudinal Study 1991-2016**

| Commute mode      | All-cause mortality      |                        | CVD mortality            |                        | Cancer incidence         |                        | Cancer mortality         |                        |
|-------------------|--------------------------|------------------------|--------------------------|------------------------|--------------------------|------------------------|--------------------------|------------------------|
|                   | Unadjusted<br>HR (95%CI) | Adjusted<br>HR (95%CI) | Unadjusted<br>HR (95%CI) | Adjusted<br>HR (95%CI) | Unadjusted<br>HR (95%CI) | Adjusted<br>HR (95%CI) | Unadjusted<br>HR (95%CI) | Adjusted<br>HR (95%CI) |
| Private motorised | 1.00                     | 1.00                   | 1.00                     | 1.00                   | 1.00                     | 1.00                   | 1.00                     | 1.00                   |
| Public transport  | 0.98 (0.94, 1.03)        | 0.96 (0.91, 1.02)      | 0.91 (0.82, 1.00)        | 0.90 (0.80, 1.01)      | 0.79 (0.76, 0.82)        | 0.93 (0.89, 0.97)      | 0.89 (0.83, 0.96)        | 0.95 (0.88, 1.03)      |
| Walk              | 1.17 (1.11, 1.23)        | 0.98 (0.92, 1.03)      | 1.02 (0.91, 1.14)        | 0.91 (0.81, 1.03)      | 1.00 (0.96, 1.05)        | 0.93 (0.89, 0.97)      | 1.16 (1.08, 1.25)        | 0.98 (0.91, 1.06)      |
| Cycle             | 0.94 (0.85, 1.03)        | 0.80 (0.73, 0.89)      | 0.93 (0.75, 1.14)        | 0.76 (0.61, 0.93)      | 0.84 (0.78, 0.92)        | 0.89 (0.82, 0.97)      | 0.88 (0.76, 1.03)        | 0.84 (0.73, 0.98)      |
|                   | Failures=13983           | N=394,746              | Failures=3172            | N=394,746              | Failures=20,980          | N=393410               | Failures=6,509           | N=394,746              |

**Disaggregated public transport modes**

| Commute mode      | All-cause mortality      |                        | CVD mortality            |                        | Cancer incidence         |                        | Cancer mortality         |                        |
|-------------------|--------------------------|------------------------|--------------------------|------------------------|--------------------------|------------------------|--------------------------|------------------------|
|                   | Unadjusted<br>HR (95%CI) | Adjusted<br>HR (95%CI) | Unadjusted<br>HR (95%CI) | Adjusted<br>HR (95%CI) | Unadjusted<br>HR (95%CI) | Adjusted<br>HR (95%CI) | Unadjusted<br>HR (95%CI) | Adjusted<br>HR (95%CI) |
| Private motorised | 1.00                     | 1.00                   | 1.00                     | 1.00                   | 1.00                     | 1.00                   | 1.00                     | 1.00                   |
| Bus               | 1.19 (1.13, 1.26)        | 1.01 (0.94, 1.07)      | 1.11 (0.99, 1.25)        | 0.97 (0.84, 1.11)      | 0.92 (0.88, 0.97)        | 0.96 (0.91, 1.01)      | 1.10 (1.01, 1.19)        | 0.99 (0.90, 1.08)      |
| Rail              | 0.73 (0.68, 0.79)        | 0.90 (0.83, 0.97)      | 0.65 (0.55, 0.77)        | 0.79 (0.67, 0.94)      | 0.64 (0.60, 0.68)        | 0.88 (0.83, 0.94)      | 0.66 (0.58, 0.74)        | 0.90 (0.80, 1.01)      |
| Walk              | 1.17 (1.11, 1.23)        | 0.98 (0.93, 1.04)      | 1.02 (0.91, 1.14)        | 0.92 (0.82, 1.04)      | 1.01 (0.96, 1.05)        | 0.93 (0.89, 0.97)      | 1.16 (1.08, 1.25)        | 0.99 (0.91, 1.07)      |
| Cycle             | 0.94 (0.85, 1.04)        | 0.81 (0.73, 0.89)      | 0.93 (0.75, 1.14)        | 0.76 (0.62, 0.94)      | 0.84 (0.78, 0.92)        | 0.89 (0.82, 0.97)      | 0.88 (0.76, 1.03)        | 0.85 (0.73, 0.99)      |
|                   | Failures=13983           | N=394,746              | Failures=3172            | N=394,746              | Failures=20,980          | N=393410               | Failures=6,509           | N=394,746              |

\*Adjusted for: age at baseline; age at baseline squared; sex; ethnicity (minority ethnic group, white); housing tenure (homeowner, non-homeowner); marital status (married, non-married); University education (no degree, has a degree); access to a car (yes, no); National Statistics Social-economic Classification (higher, intermediate, routine/manual); year entered study and presence of a long term illness at baseline (yes, no), neighbourhood measures included were population density (<2000 persons per km<sup>2</sup>, 2000+ persons per km<sup>2</sup>) and individual level Carstairs quintile (a composite of male unemployment, lack of car ownership, overcrowding and social class of household head)

Source: Office for National Statistics (ONS) Longitudinal Study of England and Wales

**Table 9: P-values for tests for interaction for each exposure and outcome combination**

| P-values                   | Gender<br>(male/female) | population<br>density<br>(<2000/<br>2000+<br>persons/km <sup>2</sup> ) | NSSEC social<br>classification<br>(routine/<br>intermediate/<br>managerial) | part-time<br>working<br>(part-time/<br>full-time)* |
|----------------------------|-------------------------|------------------------------------------------------------------------|-----------------------------------------------------------------------------|----------------------------------------------------|
| <b>All-cause mortality</b> |                         |                                                                        |                                                                             |                                                    |
| Mode                       | 0.022                   | 0.2757                                                                 | 0.025                                                                       | 0.478                                              |
| Disaggregated mode         | 0.002                   | 0.355                                                                  | 0.001                                                                       | 0.435                                              |
| <b>CVD mortality</b>       |                         |                                                                        |                                                                             |                                                    |
| Mode                       | 0.159                   | 0.413                                                                  | 0.704                                                                       | 0.879                                              |
| Disaggregated mode         | 0.221                   | 0.549                                                                  | 0.086                                                                       | 0.595                                              |
| <b>Cancer incidence</b>    |                         |                                                                        |                                                                             |                                                    |
| Mode                       | 0.044                   | 0.585                                                                  | 0.110                                                                       | 0.219                                              |
| Disaggregated mode         | 0.023                   | 0.667                                                                  | 0.287                                                                       | 0.203                                              |
| <b>Cancer mortality</b>    |                         |                                                                        |                                                                             |                                                    |
| Mode                       | 0.086                   | 0.639                                                                  | 0.249                                                                       | 0.910                                              |
| Disaggregated mode         | 0.057                   | 0.781                                                                  | 0.364                                                                       | 0.971                                              |

Source: Office for National Statistics (ONS) Longitudinal Study of England and Wales

Mode categorised as: Private motorised vehicle, public transport, walk, cycle

Disaggregated mode categorised as: Private motorised vehicle, bus rail, walk, cycle

\*carried out on data from 2001 and 2011 only.

**Table 10: NSSEC stratified Cox regression analyses of commute mode and mortality and cancer outcomes from the ONS Longitudinal Study 1991-2015/16**

| <b>Managerial occupations</b>     |                              |                            |                              |                            |                              |                            |                              |                            |
|-----------------------------------|------------------------------|----------------------------|------------------------------|----------------------------|------------------------------|----------------------------|------------------------------|----------------------------|
| <b>Commute mode</b>               | <b>All-cause mortality</b>   |                            | <b>CVD mortality</b>         |                            | <b>Cancer incidence</b>      |                            | <b>Cancer mortality</b>      |                            |
|                                   | <b>Unadjusted HR (95%CI)</b> | <b>Adjusted HR (95%CI)</b> | <b>Unadjusted HR (95%CI)</b> | <b>Adjusted HR (95%CI)</b> | <b>Unadjusted HR (95%CI)</b> | <b>Adjusted HR (95%CI)</b> | <b>Unadjusted HR (95%CI)</b> | <b>Adjusted HR (95%CI)</b> |
| Private motorised                 | 1.00                         | 1.00                       | 1.00                         | 1.00                       | 1.00                         | 1.00                       | 1.00                         | 1.00                       |
| Bus                               | 1.14 (0.99, 1.31)            | 0.95 (0.82, 1.11)          | 1.20 (0.89, 1.61)            | 1.08 (0.77, 1.50)          | 0.81 (0.72, 0.91)            | 0.94 (0.83, 1.07)          | 0.89 (0.71, 1.11)            | 0.81 (0.64, 1.03)          |
| Rail                              | 0.65 (0.58, 0.74)            | 0.76 (0.67, 0.87)          | 0.49 (0.36, 0.66)            | 0.54 (0.39, 0.74)          | 0.64 (0.59, 0.70)            | 0.92 (0.84, 1.00)          | 0.64 (0.54, 0.76)            | 0.84 (0.71, 1.01)          |
| Walk                              | 1.09 (0.96, 1.24)            | 0.98 (0.86, 1.12)          | 0.92 (0.68, 1.23)            | 0.86 (0.63, 1.18)          | 0.82 (0.74, 0.91)            | 0.89 (0.80, 0.99)          | 1.05 (0.87, 1.26)            | 0.99 (0.82, 1.20)          |
| Cycle                             | 0.64 (0.49, 0.83)            | 0.71 (0.55, 0.92)          | 0.73 (0.43, 1.24)            | 0.80 (0.47, 1.37)          | 0.72 (0.61, 0.85)            | 0.93 (0.78, 1.11)          | 0.69 (0.48, 0.97)            | 0.86 (0.60, 1.22)          |
|                                   | Failures = 3,833 N = 168231  |                            | Failures = 794 N = 168231    |                            | Failures = 7,148 N = 167056  |                            | Failures = 1,897 N = 168231  |                            |
| <b>Intermediate occupations</b>   |                              |                            |                              |                            |                              |                            |                              |                            |
| <b>Commute mode</b>               | <b>All-cause mortality</b>   |                            | <b>CVD mortality</b>         |                            | <b>Cancer incidence</b>      |                            | <b>Cancer mortality</b>      |                            |
|                                   | <b>Unadjusted HR (95%CI)</b> | <b>Adjusted HR (95%CI)</b> | <b>Unadjusted HR (95%CI)</b> | <b>Adjusted HR (95%CI)</b> | <b>Unadjusted HR (95%CI)</b> | <b>Adjusted HR (95%CI)</b> | <b>Unadjusted HR (95%CI)</b> | <b>Adjusted HR (95%CI)</b> |
| Private motorised                 | 1.00                         | 1.00                       | 1.00                         | 1.00                       | 1.00                         | 1.00                       | 1.00                         | 1.00                       |
| Bus                               | 0.98 (0.86, 1.10)            | 1.06 (0.92, 1.22)          | 0.84 (0.64, 1.12)            | 1.16 (0.84, 1.60)          | 0.81 (0.72, 0.90)            | 0.92 (0.82, 1.04)          | 0.94 (0.79, 1.13)            | 1.03 (0.84, 1.26)          |
| Rail                              | 0.72 (0.62, 0.84)            | 0.90 (0.77, 1.05)          | 0.65 (0.46, 0.91)            | 0.88 (0.62, 1.25)          | 0.61 (0.53, 0.69)            | 0.85 (0.74, 0.97)          | 0.59 (0.47, 0.74)            | 0.81 (0.64, 1.04)          |
| Walk                              | 1.17 (1.05, 1.31)            | 1.13 (1.00, 1.27)          | 1.04 (0.80, 1.34)            | 1.12 (0.85, 1.46)          | 1.07 (0.98, 1.18)            | 1.03 (0.94, 1.14)          | 1.21 (1.03, 1.42)            | 1.14 (0.97, 1.35)          |
| Cycle                             | 0.81 (0.61, 1.07)            | 0.84 (0.63, 1.11)          | 0.77 (0.41, 1.43)            | 0.86 (0.46, 1.62)          | 0.71 (0.56, 0.90)            | 0.80 (0.63, 1.01)          | 0.78 (0.52, 1.18)            | 0.86 (0.57, 1.30)          |
|                                   | Failures = 3,277 N = 125614  |                            | Failures = 690 N = 125614    |                            | Failures = 5,163 N = 124645  |                            | Failures = 1,609 N = 125614  |                            |
| <b>Routine/manual occupations</b> |                              |                            |                              |                            |                              |                            |                              |                            |
| <b>Commute mode</b>               | <b>All-cause mortality</b>   |                            | <b>CVD mortality</b>         |                            | <b>Cancer incidence</b>      |                            | <b>Cancer mortality</b>      |                            |
|                                   | <b>Unadjusted HR (95%CI)</b> | <b>Adjusted HR (95%CI)</b> | <b>Unadjusted HR (95%CI)</b> | <b>Adjusted HR (95%CI)</b> | <b>Unadjusted HR (95%CI)</b> | <b>Adjusted HR (95%CI)</b> | <b>Unadjusted HR (95%CI)</b> | <b>Adjusted HR (95%CI)</b> |
| Private motorised                 | 1.00                         | 1.00                       | 1.00                         | 1.00                       | 1.00                         | 1.00                       | 1.00                         | 1.00                       |
| Bus                               | 1.16 (1.08, 1.24)            | 1.03 (0.95, 1.12)          | 1.01 (0.87, 1.17)            | 0.90 (0.76, 1.06)          | 1.01 (0.94, 1.08)            | 0.99 (0.92, 1.07)          | 1.14 (1.02, 1.27)            | 1.06 (0.93, 1.19)          |
| Rail                              | 1.13 (0.99, 1.28)            | 1.10 (0.96, 1.25)          | 1.18 (0.92, 1.51)            | 1.03 (0.79, 1.33)          | 0.70 (0.61, 0.81)            | 0.87 (0.75, 1.00)          | 0.94 (0.76, 1.17)            | 1.08 (0.87, 1.34)          |
| Walk                              | 1.04 (0.98, 1.11)            | 0.96 (0.90, 1.04)          | 0.86 (0.75, 0.99)            | 0.86 (0.74, 1.01)          | 1.03 (0.97, 1.09)            | 0.93 (0.88, 0.99)          | 1.09 (0.99, 1.20)            | 0.97 (0.87, 1.08)          |
| Cycle                             | 0.96 (0.86, 1.08)            | 0.83 (0.73, 0.93)          | 0.86 (0.68, 1.10)            | 0.73 (0.57, 0.94)          | 0.93 (0.84, 1.03)            | 0.90 (0.81, 1.01)          | 0.93 (0.77, 1.11)            | 0.84 (0.70, 1.01)          |
|                                   | Failures = 6,873 N = 185273  |                            | Failures = 1,688 N = 185273  |                            | Failures = 8,669 N = 184304  |                            | Failures = 3,003 N = 185273  |                            |

\*Adjusted for: age at baseline; age at baseline squared; sex; ethnicity (minority ethnic group, white); housing tenure (homeowner, non-homeowner); marital status (married, non-married); University education (no degree, has a degree); access to a car (yes, no); year entered study and presence of a long term illness at baseline (yes, no), neighbourhood measures included were population density (<2000 persons per km<sup>2</sup>, 2000+ persons per km<sup>2</sup>) and individual level Carstairs quintile (a composite of male unemployment, lack of car ownership, overcrowding and social class of household head)

Source: Office for National Statistics (ONS) Longitudinal Study of England and Wales

**Table 11: Sex stratified Cox regression analyses of commute mode and mortality and cancer outcomes from the ONS Longitudinal Study 1991-2015/16**

| <b>Males</b>        |                            |                   |                      |                   |                         |                   |                         |                   |
|---------------------|----------------------------|-------------------|----------------------|-------------------|-------------------------|-------------------|-------------------------|-------------------|
| <b>Commute mode</b> | <b>All-cause mortality</b> |                   | <b>CVD mortality</b> |                   | <b>Cancer incidence</b> |                   | <b>Cancer mortality</b> |                   |
|                     | <b>Unadjusted</b>          | <b>Adjusted</b>   | <b>Unadjusted</b>    | <b>Adjusted</b>   | <b>Unadjusted</b>       | <b>Adjusted</b>   | <b>Unadjusted</b>       | <b>Adjusted</b>   |
|                     | <b>HR (95%CI)</b>          | <b>HR (95%CI)</b> | <b>HR (95%CI)</b>    | <b>HR (95%CI)</b> | <b>HR (95%CI)</b>       | <b>HR (95%CI)</b> | <b>HR (95%CI)</b>       | <b>HR (95%CI)</b> |
| Private motorised   | 1.00                       | 1.00              | 1.00                 | 1.00              | 1.00                    | 1.00              | 1.00                    | 1.00              |
| Bus                 | 1.41 (1.31, 1.53)          | 1.08 (0.99, 1.18) | 1.41 (1.22, 1.64)    | 1.02 (0.87, 1.21) | 0.86 (0.78, 0.93)       | 1.02 (0.92, 1.12) | 1.16 (1.02, 1.32)       | 1.09 (0.94, 1.26) |
| Rail                | 0.75 (0.69, 0.82)          | 0.90 (0.82, 0.99) | 0.64 (0.53, 0.77)    | 0.78 (0.64, 0.94) | 0.67 (0.62, 0.73)       | 0.91 (0.84, 0.99) | 0.68 (0.59, 0.79)       | 0.94 (0.81, 1.09) |
| Walk                | 1.24 (1.15, 1.33)          | 1.01 (0.94, 1.09) | 1.09 (0.95, 1.26)    | 0.88 (0.75, 1.02) | 0.90 (0.84, 0.97)       | 0.99 (0.92, 1.07) | 1.14 (1.02, 1.28)       | 1.07 (0.95, 1.20) |
| Cycle               | 0.82 (0.73, 0.92)          | 0.80 (0.71, 0.90) | 0.79 (0.63, 0.99)    | 0.78 (0.62, 0.99) | 0.77 (0.69, 0.86)       | 0.93 (0.84, 1.04) | 0.75 (0.63, 0.91)       | 0.84 (0.70, 1.02) |
|                     | Failures = 9363            | N = 209510        | Failures = 2517      | N = 209510        | Failures = 11174        | N = 209024        | Failures = 3869         | N = 209510        |
| <b>Female</b>       |                            |                   |                      |                   |                         |                   |                         |                   |
| <b>Commute mode</b> | <b>All-cause mortality</b> |                   | <b>CVD mortality</b> |                   | <b>Cancer incidence</b> |                   | <b>Cancer mortality</b> |                   |
|                     | <b>Unadjusted</b>          | <b>Adjusted</b>   | <b>Unadjusted</b>    | <b>Adjusted</b>   | <b>Unadjusted</b>       | <b>Adjusted</b>   | <b>Unadjusted</b>       | <b>Adjusted</b>   |
|                     | <b>HR (95%CI)</b>          | <b>HR (95%CI)</b> | <b>HR (95%CI)</b>    | <b>HR (95%CI)</b> | <b>HR (95%CI)</b>       | <b>HR (95%CI)</b> | <b>HR (95%CI)</b>       | <b>HR (95%CI)</b> |
| Private motorised   | 1.00                       | 1.00              | 1.00                 | 1.00              | 1.00                    | 1.00              | 1.00                    | 1.00              |
| Bus                 | 1.38 (1.27, 1.50)          | 0.95 (0.87, 1.04) | 1.80 (1.46, 2.23)    | 0.88 (0.69, 1.12) | 0.96 (0.90, 1.02)       | 0.96 (0.90, 1.03) | 1.20 (1.07, 1.34)       | 0.96 (0.84, 1.08) |
| Rail                | 0.72 (0.62, 0.83)          | 0.89 (0.77, 1.03) | 0.82 (0.56, 1.19)    | 0.93 (0.63, 1.38) | 0.60 (0.55, 0.66)       | 0.84 (0.76, 0.93) | 0.62 (0.51, 0.75)       | 0.84 (0.69, 1.03) |
| Walk                | 1.46 (1.35, 1.57)          | 0.97 (0.89, 1.05) | 1.99 (1.65, 2.41)    | 0.96 (0.78, 1.19) | 1.06 (1.01, 1.12)       | 0.94 (0.88, 1.00) | 1.32 (1.20, 1.46)       | 0.98 (0.88, 1.09) |
| Cycle               | 1.20 (0.98, 1.45)          | 0.85 (0.70, 1.03) | 1.39 (0.84, 2.30)    | 0.78 (0.47, 1.29) | 1.01 (0.88, 1.16)       | 0.88 (0.77, 1.01) | 1.19 (0.93, 1.54)       | 0.91 (0.70, 1.17) |
|                     | Failures = 4630            | N = 185236        | Failures = 657       | N = 185236        | Failures = 9806         | N = 184386        | Failures = 2644         | N = 185236        |

\*Adjusted for: age at baseline; age at baseline squared; ethnicity (minority ethnic group, white); housing tenure (homeowner, non-homeowner); marital status (married, non-married); University education (no degree, has a degree); access to a car (yes, no); year entered study and presence of a long term illness at baseline (yes, no), neighbourhood measures included were population density (<2000 persons per km<sup>2</sup>, 2000+ persons per km<sup>2</sup>), National Statistics Social-economic Classification (higher, intermediate, routine/manual) and individual level Carstairs quintile (a composite of male unemployment, lack of car ownership, overcrowding and social class of household head)

Source: Office for National Statistics (ONS) Longitudinal Study of England and Wales

**Table 12: straight line distance to work (km) among sample for 2001 and 2011**

|                                          |       | <b>N</b> | <b>Median</b> | <b>25th<br/>percentile</b> | <b>75th<br/>percentile</b> | <b>Mean</b> | <b>SD</b> |
|------------------------------------------|-------|----------|---------------|----------------------------|----------------------------|-------------|-----------|
| Private motorised vehicle                |       | 307442   | 6.5           | 2.7                        | 14.3                       | 13.9        | 29.5      |
| Bus                                      |       | 36918    | 4.4           | 2.6                        | 7.4                        | 8.8         | 25.1      |
| Rail                                     |       | 37231    | 13.1          | 7.4                        | 24.5                       | 23.8        | 36.8      |
| Walk                                     |       | 52514    | 0.8           | 0.3                        | 1.5                        | 4.8         | 26.5      |
| Cycle                                    |       | 13834    | 2.5           | 1.3                        | 4.8                        | 5.9         | 21.5      |
| <b>Long and short distance commuters</b> |       |          |               |                            |                            |             |           |
| Private motorised vehicle                | Short | 155491   | 2.8           | 1.4                        | 4.4                        | 2.9         | 1.9       |
| Private motorised vehicle                | Long  | 151951   | 14.5          | 9.7                        | 24.3                       | 25.2        | 38.8      |
| Bus                                      | Short | 18846    | 2.6           | 1.8                        | 3.5                        | 2.6         | 1.1       |
| Bus                                      | Long  | 18072    | 7.5           | 5.7                        | 11.5                       | 15.3        | 34.7      |
| Rail                                     | Short | 19233    | 7.6           | 4.7                        | 10.4                       | 7.4         | 3.7       |
| Rail                                     | Long  | 17998    | 25.4          | 17.6                       | 46.7                       | 41.5        | 46.8      |
| Walk                                     | Short | 27364    | 0.3           | 0.1                        | 0.6                        | 0.4         | 0.2       |
| Walk                                     | Long  | 25150    | 1.6           | 1.1                        | 2.8                        | 9.7         | 37.7      |
| Cycle                                    | Short | 7097     | 1.3           | 0.8                        | 1.9                        | 1.3         | 0.7       |
| Cycle                                    | Long  | 6737     | 4.9           | 3.5                        | 7.8                        | 10.8        | 30.0      |

Source: Office for National Statistics (ONS) Longitudinal Study of England and Wales

**Table 13: Cox regression analyses of commute mode and mortality and cancer outcomes using the ONS Longitudinal Study 1991-2016 disaggregating long and short distance commuters.**

| Commute mode      |       | All-cause mortality |                   | CVD mortality     |                   | Cancer incidence  |                   | Cancer mortality  |                   |
|-------------------|-------|---------------------|-------------------|-------------------|-------------------|-------------------|-------------------|-------------------|-------------------|
|                   |       | Unadjusted          | Adjusted          | Unadjusted        | Adjusted          | Unadjusted        | Adjusted          | Unadjusted        | Adjusted          |
|                   |       | HR (95%CI)          | HR (95%CI)        | HR (95%CI)        | HR (95%CI)        | HR (95%CI)        | HR (95%CI)        | HR (95%CI)        | HR (95%CI)        |
| Private motorised | Short | 1.00                | 1.00              | 1.00              | 1.00              | 1.00              | 1.00              | 1.00              | 1.00              |
| Private motorised | Long  | 0.87 (0.82, 0.92)   | 0.97 (0.92, 1.03) | 0.94 (0.83, 1.07) | 1.03 (0.90, 1.17) | 0.90 (0.87, 0.94) | 0.99 (0.95, 1.03) | 0.83 (0.77, 0.90) | 0.96 (0.88, 1.04) |
| Bus               | Short | 1.21 (1.09, 1.35)   | 1.02 (0.91, 1.15) | 1.27 (0.99, 1.63) | 1.19 (0.91, 1.55) | 0.88 (0.80, 0.96) | 0.95 (0.86, 1.04) | 1.06 (0.90, 1.24) | 0.96 (0.80, 1.14) |
| Bus               | Long  | 0.99 (0.88, 1.12)   | 0.97 (0.85, 1.10) | 0.97 (0.73, 1.29) | 0.98 (0.73, 1.32) | 0.77 (0.70, 0.85) | 0.97 (0.88, 1.08) | 0.86 (0.72, 1.03) | 0.94 (0.78, 1.14) |
| Rail              | Short | 0.68 (0.59, 0.79)   | 0.94 (0.81, 1.09) | 0.65 (0.46, 0.91) | 0.90 (0.63, 1.29) | 0.57 (0.51, 0.63) | 0.92 (0.82, 1.04) | 0.61 (0.49, 0.75) | 0.97 (0.78, 1.21) |
| Rail              | Long  | 0.54 (0.46, 0.63)   | 0.80 (0.68, 0.94) | 0.43 (0.28, 0.65) | 0.65 (0.42, 0.98) | 0.61 (0.54, 0.68) | 0.87 (0.78, 0.97) | 0.52 (0.42, 0.66) | 0.84 (0.66, 1.05) |
| Walk              | Short | 1.20 (1.10, 1.32)   | 1.01 (0.91, 1.11) | 1.12 (0.90, 1.41) | 1.04 (0.83, 1.31) | 1.01 (0.94, 1.09) | 0.92 (0.86, 1.00) | 1.23 (1.08, 1.41) | 1.04 (0.90, 1.19) |
| Walk              | Long  | 0.98 (0.88, 1.09)   | 0.95 (0.85, 1.06) | 0.86 (0.66, 1.12) | 0.91 (0.69, 1.19) | 0.75 (0.69, 0.82) | 0.86 (0.78, 0.94) | 0.92 (0.79, 1.07) | 0.95 (0.81, 1.11) |
| Cycle             | Short | 0.93 (0.77, 1.12)   | 0.83 (0.69, 1.01) | 0.82 (0.52, 1.32) | 0.72 (0.45, 1.16) | 0.82 (0.70, 0.95) | 0.89 (0.77, 1.03) | 0.89 (0.68, 1.18) | 0.89 (0.67, 1.17) |
| Cycle             | Long  | 0.78 (0.64, 0.97)   | 0.80 (0.65, 0.99) | 0.85 (0.53, 1.36) | 0.82 (0.51, 1.32) | 0.75 (0.65, 0.88) | 0.98 (0.83, 1.14) | 0.77 (0.57, 1.04) | 0.93 (0.69, 1.26) |
|                   |       | Failures=7146       | N=306578          | Failures=1327     | N=306578          | Failures=12896    | N=303151          | Failures=3464     | N=306578          |

\*Adjusted for: age at baseline; age at baseline squared; sex; ethnicity (minority ethnic group, white); housing tenure (homeowner, non-homeowner); marital status (married, non-married); University education (no degree, has a degree); access to a car (yes, no); National Statistics Social-economic Classification (higher, intermediate, routine/manual); year entered study and presence of a long term illness at baseline (yes, no), neighbourhood measures included were population density (<2000 persons per km<sup>2</sup>, 2000+ persons per km<sup>2</sup>) and individual level Carstairs quintile (a composite of male unemployment, lack of car ownership, overcrowding and social class of household head)

Source: Office for National Statistics (ONS) Longitudinal Study of England and Wales



**Table 14: Baseline characteristics of sample and deaths 2001-2016 for participants in analyses of changes in mode between 1991 and 2001 – switching between private motorised vehicle and active or public transport and vice versa**

|                                     | Continuing car user | Switched from car to active or public transport | Continuing active or public transport user | Switched from active or public transport to car | Total  |
|-------------------------------------|---------------------|-------------------------------------------------|--------------------------------------------|-------------------------------------------------|--------|
|                                     | N (%)               | N (%)                                           | N (%)                                      | N (%)                                           |        |
| All                                 | 78.6%               | 5.3%                                            | 7.2%                                       | 8.9%                                            | 96,939 |
| <b>Age</b>                          |                     |                                                 |                                            |                                                 |        |
| 0-29                                | 77.2%               | 6.3%                                            | 4.9%                                       | 11.6%                                           | 31,616 |
| 30-44                               | 79.6%               | 4.8%                                            | 7.6%                                       | 8.0%                                            | 46,708 |
| 45-59                               | 78.3%               | 4.8%                                            | 10.4%                                      | 6.6%                                            | 18,173 |
| 60+                                 | 74.4%               | 7.5%                                            | 12.2%                                      | 5.9%                                            | 442    |
| <b>Sex</b>                          |                     |                                                 |                                            |                                                 |        |
| Male                                | 82.9%               | 4.9%                                            | 4.8%                                       | 7.4%                                            | 57,964 |
| Female                              | 72.1%               | 5.9%                                            | 10.8%                                      | 11.2%                                           | 38,975 |
| <b>Ethnicity</b>                    |                     |                                                 |                                            |                                                 |        |
| White                               | 78.5%               | 5.3%                                            | 7.3%                                       | 8.9%                                            | 93,524 |
| Minority ethnicity                  | 80.8%               | 4.2%                                            | 5.7%                                       | 9.3%                                            | 3,415  |
| <b>University education</b>         |                     |                                                 |                                            |                                                 |        |
| No degree                           | 76.7%               | 5.6%                                            | 8.2%                                       | 9.4%                                            | 75,611 |
| Has a degree                        | 85.1%               | 4.1%                                            | 3.7%                                       | 7.1%                                            | 21,328 |
| <b>Housing tenure</b>               |                     |                                                 |                                            |                                                 |        |
| Owns in both                        | 81.7%               | 4.7%                                            | 6.1%                                       | 7.5%                                            | 77,923 |
| Becomes a renter                    | 70.8%               | 11.2%                                           | 6.8%                                       | 11.2%                                           | 4,084  |
| Rents in both                       | 57.2%               | 8.3%                                            | 20.4%                                      | 14.1%                                           | 6,109  |
| Becomes an owner                    | 69.4%               | 5.8%                                            | 8.0%                                       | 16.8%                                           | 8,823  |
| <b>Marital status</b>               |                     |                                                 |                                            |                                                 |        |
| Unmarried in both                   | 74.7%               | 5.9%                                            | 8.4%                                       | 11.0%                                           | 19,809 |
| Becomes married                     | 79.4%               | 6.0%                                            | 3.9%                                       | 10.7%                                           | 13,365 |
| Married in both                     | 79.9%               | 4.7%                                            | 7.7%                                       | 7.7%                                            | 55,459 |
| Becomes unmarried                   | 77.5%               | 6.4%                                            | 7.1%                                       | 8.9%                                            | 8,306  |
| <b>Car access</b>                   |                     |                                                 |                                            |                                                 |        |
| No access at either                 | 13.6%               | 9.1%                                            | 64.3%                                      | 13.0%                                           | 1,903  |
| Gains access                        | 35.9%               | 4.6%                                            | 19.5%                                      | 40.0%                                           | 3,891  |
| Access in both                      | 82.6%               | 4.8%                                            | 5.0%                                       | 7.5%                                            | 89,567 |
| Loses access                        | 32.0%               | 26.7%                                           | 34.0%                                      | 7.4%                                            | 1,578  |
| <b>Population density</b>           |                     |                                                 |                                            |                                                 |        |
| Low density in both                 | 81.3%               | 4.7%                                            | 6.5%                                       | 7.6%                                            | 41,870 |
| Moves from low to high density      | 77.7%               | 7.3%                                            | 5.4%                                       | 9.6%                                            | 9,123  |
| High density in both density        | 75.2%               | 5.6%                                            | 9.5%                                       | 9.7%                                            | 34,582 |
| Moves from high to low              | 79.6%               | 4.7%                                            | 4.6%                                       | 11.1%                                           | 11,364 |
| <b>Long term illness</b>            |                     |                                                 |                                            |                                                 |        |
| Never ill                           | 78.7%               | 5.3%                                            | 7.2%                                       | 8.9%                                            | 88,751 |
| Becomes ill                         | 76.9%               | 5.6%                                            | 8.2%                                       | 9.3%                                            | 6,304  |
| Ill in both                         | 80.7%               | 4.4%                                            | 7.7%                                       | 7.2%                                            | 867    |
| Becomes well                        | 76.1%               | 6.1%                                            | 7.9%                                       | 9.9%                                            | 1,017  |
| <b>Baseline NSSEC social class</b>  |                     |                                                 |                                            |                                                 |        |
| Higher                              | 87.9%               | 3.7%                                            | 3.1%                                       | 5.2%                                            | 31,005 |
| Intermediate                        | 83.0%               | 5.1%                                            | 4.6%                                       | 7.3%                                            | 25,509 |
| Routine/Manual                      | 68.6%               | 6.6%                                            | 12.1%                                      | 12.8%                                           | 40,425 |
| <b>Change in NSSEC social class</b> |                     |                                                 |                                            |                                                 |        |
| Unchanged NSSEC                     | 78.0%               | 5.1%                                            | 8.4%                                       | 8.5%                                            | 65,677 |
| Increased NSSEC                     | 79.0%               | 4.7%                                            | 4.8%                                       | 11.5%                                           | 20,014 |
| Decreased NSSEC                     | 80.8%               | 7.4%                                            | 4.8%                                       | 7.0%                                            | 11,248 |
| <b>Baseline Carstairs index</b>     |                     |                                                 |                                            |                                                 |        |
| Least deprived                      | 84.9%               | 4.6%                                            | 4.3%                                       | 6.3%                                            | 22,553 |
| Next least deprived                 | 80.8%               | 5.2%                                            | 6.1%                                       | 7.9%                                            | 22,123 |
| Mid-point                           | 77.0%               | 5.6%                                            | 8.2%                                       | 9.3%                                            | 20,991 |
| Moderate deprivation                | 74.8%               | 5.6%                                            | 8.8%                                       | 10.7%                                           | 18,680 |
| Most deprived                       | 71.5%               | 5.6%                                            | 10.7%                                      | 12.2%                                           | 12,592 |
| <b>Change in Carstairs index</b>    |                     |                                                 |                                            |                                                 |        |

|                                   |       |      |       |       |        |
|-----------------------------------|-------|------|-------|-------|--------|
| Unchanged deprivation quintile    | 78.6% | 5.0% | 8.2%  | 8.2%  | 47,934 |
| Moved to a more deprived quintile | 79.3% | 4.9% | 5.8%  | 10.1% | 27,053 |
| Moved to a less deprived quintile | 77.5% | 6.4% | 6.9%  | 9.1%  | 21,952 |
| <b>Residential address</b>        |       |      |       |       |        |
| Did not move                      | 77.6% | 4.6% | 10.2% | 7.6%  | 46,997 |
| Moved residence                   | 79.4% | 5.9% | 4.4%  | 10.2% | 49,915 |
| <b>Events</b>                     |       |      |       |       |        |
| All-cause mortality               | 78.4% | 5.0% | 9.9%  | 6.8%  | 5,817  |
| CVD mortality                     | 80.2% | 4.3% | 10.3% | 5.2%  | 1,090  |
| Cancer mortality                  | 79.4% | 4.3% | 9.6%  | 6.7%  | 2,950  |
| Other mortality                   | 75.5% | 6.5% | 10.2% | 7.8%  | 1,777  |

---

NSSEC – National Statistics socio-economic classification

PMV – private motorised vehicle

Source: Office for National Statistics (ONS) Longitudinal Study of England and Wales

**Table 15: Cox regression analyses of change in commute mode between 1991 and 2001 (active and public versus private motorised vehicle) and mortality and cancer outcomes from the ONS Longitudinal Study 2001-2015/16**

| <b>Private motorised vehicle users in 1991s</b>                       |                                  |                                |                                  |                                |                                  |                                |                                  |                                |
|-----------------------------------------------------------------------|----------------------------------|--------------------------------|----------------------------------|--------------------------------|----------------------------------|--------------------------------|----------------------------------|--------------------------------|
| <b>Commute mode</b>                                                   | <b>All-cause mortality</b>       |                                | <b>CVD mortality</b>             |                                | <b>Cancer incidence</b>          |                                | <b>Cancer mortality</b>          |                                |
|                                                                       | <b>Unadjusted<br/>HR (95%CI)</b> | <b>Adjusted<br/>HR (95%CI)</b> | <b>Unadjusted<br/>HR (95%CI)</b> | <b>Adjusted<br/>HR (95%CI)</b> | <b>Unadjusted<br/>HR (95%CI)</b> | <b>Adjusted<br/>HR (95%CI)</b> | <b>Unadjusted<br/>HR (95%CI)</b> | <b>Adjusted<br/>HR (95%CI)</b> |
| Continuing private motorised vehicle user                             | 1.00                             | 1.00                           | 1.00                             | 1.00                           | 1.00                             | 1.00                           | 1.00                             | 1.00                           |
| Switched from private motorised vehicle to active or public transport | 0.97 (0.89, 1.06)                | 0.93 (0.84, 1.02)              | 0.92 (0.75, 1.13)                | 0.96 (0.77, 1.19)              | 0.90 (0.84, 0.97)                | 0.97 (0.90, 1.04)              | 0.88 (0.77, 1.00)                | 0.88 (0.77, 1.01)              |
|                                                                       | Failures = 5098                  | N = 85451                      | Failures = 972                   | N = 85451                      | Failures = 8333                  | N = 85451                      | Failures = 2592                  | N = 85451                      |
| <b>Active/public transport users in 1991</b>                          |                                  |                                |                                  |                                |                                  |                                |                                  |                                |
| <b>Commute mode</b>                                                   | <b>All-cause mortality</b>       |                                | <b>CVD mortality</b>             |                                | <b>Cancer incidence</b>          |                                | <b>Cancer mortality</b>          |                                |
|                                                                       | <b>Unadjusted<br/>HR (95%CI)</b> | <b>Adjusted<br/>HR (95%CI)</b> | <b>Unadjusted<br/>HR (95%CI)</b> | <b>Adjusted<br/>HR (95%CI)</b> | <b>Unadjusted<br/>HR (95%CI)</b> | <b>Adjusted<br/>HR (95%CI)</b> | <b>Unadjusted<br/>HR (95%CI)</b> | <b>Adjusted<br/>HR (95%CI)</b> |
| Continuing active or public transport user                            | 1.00                             | 1.00                           | 1.00                             | 1.00                           | 1.00                             | 1.00                           | 1.00                             | 1.00                           |
| Switched from active or public transport to private motorised vehicle | 0.64 (0.59, 0.71)                | 0.99 (0.89, 1.09)              | 0.61 (0.49, 0.76)                | 0.93 (0.74, 1.19)              | 0.77 (0.72, 0.83)                | 1.05 (0.97, 1.14)              | 0.66 (0.58, 0.76)                | 0.97 (0.84, 1.13)              |
|                                                                       | Failures = 1847                  | N = 31836                      | Failures = 330                   | N = 31836                      | Failures = 2736                  | N = 31836                      | Failures = 876                   | N = 31836                      |

\*Adjusted for: age at baseline; age at baseline squared; sex; ethnicity (minority ethnic group, white); housing tenure (homeowner at both, homeowner to renting, renting at both, renting to homeowner); marital status (unmarried at both, unmarried to married, married at both, married to unmarried); education (has a university degree at 1991 or 2001); access to a car (no access at both, no access to access, access at both, access to no access); presence of a long term illness (not ill at both, not ill to ill, ill at both, ill to not ill), National Statistics Social-economic Classification at baseline (higher, intermediate, routine/manual); Change in National Statistics Social-economic Classification (unchanged NSSEC, increased NSSEC, decreased NSSEC); individual level Carstairs quintile at baseline (a composite of male unemployment, lack of car ownership, overcrowding and social class of household head); change in Carstairs quintile (unchanged deprivation quintile, moved to higher deprivation quintile, moved to a lower deprivation quintile); population density (<2000 persons per km<sup>2</sup> in both, moves from <2000 to 2000+ persons per km<sup>2</sup>, 2000+ persons per km<sup>2</sup> in both, from 2000+ to <2000 persons per km<sup>2</sup>)

PMV – private motorised vehicle

Source: Office for National Statistics (ONS) Longitudinal Study of England and Wales

**Table 16: Cox regression analyses of commute mode and mortality using the ONS Longitudinal Study 2001-2011 with and without adjustment for self-reported health**

| Commute mode                                     | All-cause mortality |                                | CVD mortality            |                                |
|--------------------------------------------------|---------------------|--------------------------------|--------------------------|--------------------------------|
|                                                  | HR (95% CI)         | Maximally Adjusted HR (95% CI) | HR (95% CI)              | Maximally Adjusted HR (95% CI) |
| Private motorised vehicle                        | 1.00                | 1.00                           | 1.00                     | 1.00                           |
| Public Transport                                 | 0.92 (0.84, 1.01)   | 0.93 (0.85, 1.02)              | 0.88 (0.71, 1.09)        | 0.89 (0.71, 1.10)              |
| Walk                                             | 1.02 (0.93, 1.12)   | 1.02 (0.93, 1.12)              | 0.99 (0.79, 1.22)        | 0.99 (0.80, 1.23)              |
| Cycle                                            | 0.80 (0.68, 0.96)   | 0.81 (0.68, 0.97)              | 0.68 (0.46, 1.03)        | 0.69 (0.46, 1.03)              |
| Age at baseline                                  | 1.14 (1.12, 1.15)   | 1.13 (1.11, 1.15)              | 1.19 (1.15, 1.23)        | 1.19 (1.14, 1.23)              |
| Age at baseline squared                          | 1.00 (1.00, 1.00)   | 1.00 (1.00, 1.00)              | 1.00 (1.00, 1.00)        | 1.00 (1.00, 1.00)              |
| Women                                            | 0.60 (0.56, 0.64)   | 0.60 (0.56, 0.64)              | 0.32 (0.27, 0.37)        | 0.32 (0.27, 0.37)              |
| Married                                          | 0.79 (0.74, 0.84)   | 0.79 (0.74, 0.85)              | 0.73 (0.64, 0.84)        | 0.74 (0.64, 0.85)              |
| Black minority ethnic                            | 0.72 (0.63, 0.83)   | 0.72 (0.63, 0.83)              | 0.91 (0.69, 1.21)        | 0.91 (0.68, 1.21)              |
| Has access to a car                              | 0.61 (0.56, 0.68)   | 0.62 (0.57, 0.69)              | 0.64 (0.52, 0.79)        | 0.65 (0.52, 0.80)              |
| Population density 2000+ persons/km <sup>2</sup> | 1.01 (0.95, 1.08)   | 1.01 (0.95, 1.08)              | 0.94 (0.82, 1.08)        | 0.94 (0.82, 1.08)              |
| Entered study 1991                               | 1.00                | 1.00                           | 1.00                     | 1.00                           |
| Entered study 2001                               | 0.44 (0.41, 0.47)   | 0.44 (0.41, 0.47)              | 0.33 (0.28, 0.39)        | 0.33 (0.28, 0.39)              |
| Has a degree                                     | 0.80 (0.74, 0.88)   | 0.81 (0.74, 0.88)              | 0.61 (0.49, 0.75)        | 0.61 (0.49, 0.76)              |
| Non-home owner                                   | 1.25 (1.16, 1.35)   | 1.23 (1.14, 1.33)              | 1.38 (1.17, 1.62)        | 1.36 (1.15, 1.60)              |
| <b>Socio-economic classification (NSSEC)</b>     |                     |                                |                          |                                |
| Higher                                           | 1.00                | 1.00                           | 1.00                     | 1.00                           |
| Intermediate                                     | 1.04 (0.95, 1.13)   | 1.04 (0.95, 1.13)              | 1.10 (0.92, 1.33)        | 1.10 (0.92, 1.33)              |
| Routine/Manual                                   | 1.16 (1.07, 1.24)   | 1.15 (1.07, 1.24)              | 1.14 (0.97, 1.34)        | 1.14 (0.97, 1.34)              |
| <b>Carstairs Deprivation Index Quintile</b>      |                     |                                |                          |                                |
| Least deprived                                   | 1.00                | 1.00                           | 1.00                     | 1.00                           |
| Next least deprived                              | 1.04 (0.95, 1.13)   | 1.04 (0.95, 1.13)              | 1.27 (1.05, 1.55)        | 1.27 (1.04, 1.54)              |
| Mid-point                                        | 1.04 (0.95, 1.13)   | 1.03 (0.94, 1.12)              | 1.17 (0.95, 1.43)        | 1.16 (0.94, 1.42)              |
| Moderate deprivation                             | 1.11 (1.01, 1.22)   | 1.10 (1.00, 1.21)              | 1.28 (1.04, 1.59)        | 1.27 (1.02, 1.57)              |
| Most deprived                                    | 1.12 (1.01, 1.24)   | 1.10 (0.99, 1.22)              | 1.36 (1.08, 1.72)        | 1.35 (1.06, 1.70)              |
| Has a long term illness at baseline              | 1.84 (1.67, 2.04)   | 1.50 (1.35, 1.66)              | 2.27 (1.85, 2.79)        | 1.93 (1.55, 2.40)              |
| Health is not good or fairly good                |                     | 2.19 (2.00, 2.41)              |                          | 1.97 (1.61, 2.42)              |
| Failures=4,963 N=209371                          |                     |                                | Failures = 1000 N=209371 |                                |

NSSEC – National Statistics socio-economic classification

Source: Office for National Statistics (ONS) Longitudinal Study of England and Wales

**Table 17: Cox regression analyses of commute mode and mortality outcomes using the ONS Longitudinal Study 1991-2016, excluded the first 2 years of follow-up in each 10 year period**

| Commute mode      | All-cause mortality |                   | CVD mortality     |                   | Cancer incidence  |                   | Cancer mortality  |                   |
|-------------------|---------------------|-------------------|-------------------|-------------------|-------------------|-------------------|-------------------|-------------------|
|                   | Unadjusted          | Adjusted          | Unadjusted        | Adjusted          | Unadjusted        | Adjusted          | Unadjusted        | Adjusted          |
|                   | HR (95%CI)          | HR (95%CI)        | HR (95%CI)        | HR (95%CI)        | HR (95%CI)        | HR (95%CI)        | HR (95%CI)        | HR (95%CI)        |
| Private motorised | 1.00                | 1.00              | 1.00              | 1.00              | 1.00              | 1.00              | 1.00              | 1.00              |
| Public transport  | 1.01 (0.96, 1.06)   | 0.99 (0.93, 1.05) | 0.94 (0.85, 1.05) | 0.90 (0.79, 1.02) | 0.80 (0.76, 0.83) | 0.93 (0.88, 0.98) | 0.92 (0.85, 0.99) | 0.98 (0.90, 1.07) |
| Walk              | 1.19 (1.12, 1.25)   | 0.99 (0.93, 1.05) | 1.07 (0.95, 1.20) | 0.92 (0.81, 1.05) | 1.00 (0.95, 1.05) | 0.92 (0.87, 0.97) | 1.17 (1.08, 1.27) | 0.99 (0.91, 1.08) |
| Cycle             | 0.94 (0.85, 1.05)   | 0.80 (0.72, 0.90) | 0.95 (0.76, 1.19) | 0.75 (0.60, 0.95) | 0.86 (0.78, 0.94) | 0.89 (0.81, 0.98) | 0.93 (0.79, 1.08) | 0.88 (0.75, 1.03) |
|                   | Failures=11,893     | N=392996          | Failures=2,618    | N = 392996        | Failures = 17015  | N = 390402        | Failures=5611     | N = 392996        |

\*Adjusted for: age at baseline; age at baseline squared; sex; ethnicity (minority ethnic group, white); housing tenure (homeowner, non-homeowner); marital status (married, non-married); education (no degree, has a degree); access to a car (yes, no); National Statistics Social-economic Classification (higher, intermediate, routine/manual); year entered study and presence of a long term illness at baseline (yes, no), neighbourhood measures included were population density (<2000 persons per km<sup>2</sup>, 2000+ persons per km<sup>2</sup>) and individual level Carstairs quintile (a composite of male unemployment, lack of car ownership, overcrowding and social class of household head)

Source: Office for National Statistics (ONS) Longitudinal Study of England and Wales

**Table 18: Cross tabulation of commute modes for this present in consecutive censuses  
1991 and 2001**

|                          | <b>Commute mode 2001</b> |     |       |     |       |     |         |     |         |     |        |
|--------------------------|--------------------------|-----|-------|-----|-------|-----|---------|-----|---------|-----|--------|
|                          | Private<br>motorised     |     | Bus   |     | Rail  |     | Walking |     | Cycling |     | Total  |
| <b>Commute mode 1991</b> |                          |     |       |     |       |     |         |     |         |     |        |
| Private motorised        | 76,071                   | 89% | 2,050 | 2%  | 2,123 | 2%  | 3,667   | 4%  | 1,436   | 2%  | 85,347 |
| Bus                      | 5,509                    | 52% | 3,036 | 29% | 599   | 6%  | 1,157   | 11% | 242     | 2%  | 10,543 |
| Rail                     | 2,912                    | 39% | 466   | 6%  | 3,572 | 48% | 315     | 4%  | 117     | 2%  | 7,382  |
| Walking                  | 6,467                    | 48% | 1,167 | 9%  | 370   | 3%  | 4,890   | 37% | 452     | 3%  | 13,346 |
| Cycling                  | 2,162                    | 52% | 180   | 4%  | 110   | 3%  | 408     | 10% | 1,260   | 31% | 4,120  |
| <b>2001 and 2011</b>     |                          |     |       |     |       |     |         |     |         |     |        |
|                          | <b>Commute mode 2011</b> |     |       |     |       |     |         |     |         |     |        |
|                          | Private<br>motorised     |     | Bus   |     | Rail  |     | Walking |     | Cycling |     | Total  |
| <b>Commute mode 2001</b> |                          |     |       |     |       |     |         |     |         |     |        |
| Private motorised        | 85,589                   | 88% | 2,117 | 2%  | 3,145 | 3%  | 4,555   | 5%  | 1,525   | 2%  | 96,931 |
| Bus                      | 4,340                    | 47% | 2,783 | 30% | 729   | 8%  | 1,119   | 12% | 194     | 2%  | 9,165  |
| Rail                     | 3,002                    | 33% | 522   | 6%  | 4,740 | 53% | 461     | 5%  | 242     | 3%  | 8,967  |
| Walking                  | 5,747                    | 47% | 950   | 8%  | 479   | 4%  | 4,723   | 38% | 397     | 3%  | 12,296 |
| Cycling                  | 2,016                    | 50% | 160   | 4%  | 155   | 4%  | 410     | 10% | 1,267   | 32% | 4,008  |

Source: Office for National Statistics (ONS) Longitudinal Study of England and Wales
